# Supplementary material for: FAM84B, amplified in pancreatic ductal adenocarcinoma, promotes tumorigenesis through the Wnt/β-catenin pathway
Source: publisher site journal article supplement (doi:10.18632/aging.103044), 2020-04-14
Supplement: Supplementary file [file aging-v12i8-103044-supplementary-material-SD1.pdf]

**SUPPLEMENTARY FIGURES**

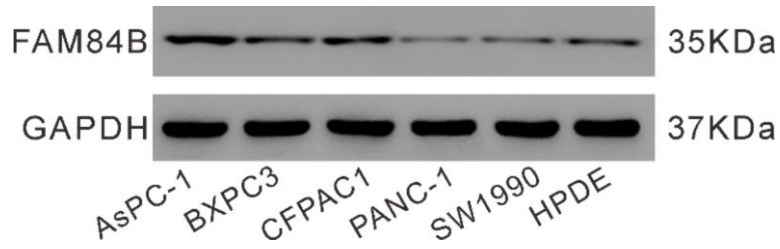

**Supplementary Figure 1. Western blotting analysis of FAM84B protein expression in 5 pancreatic cancer cell lines and HPDE cells.**

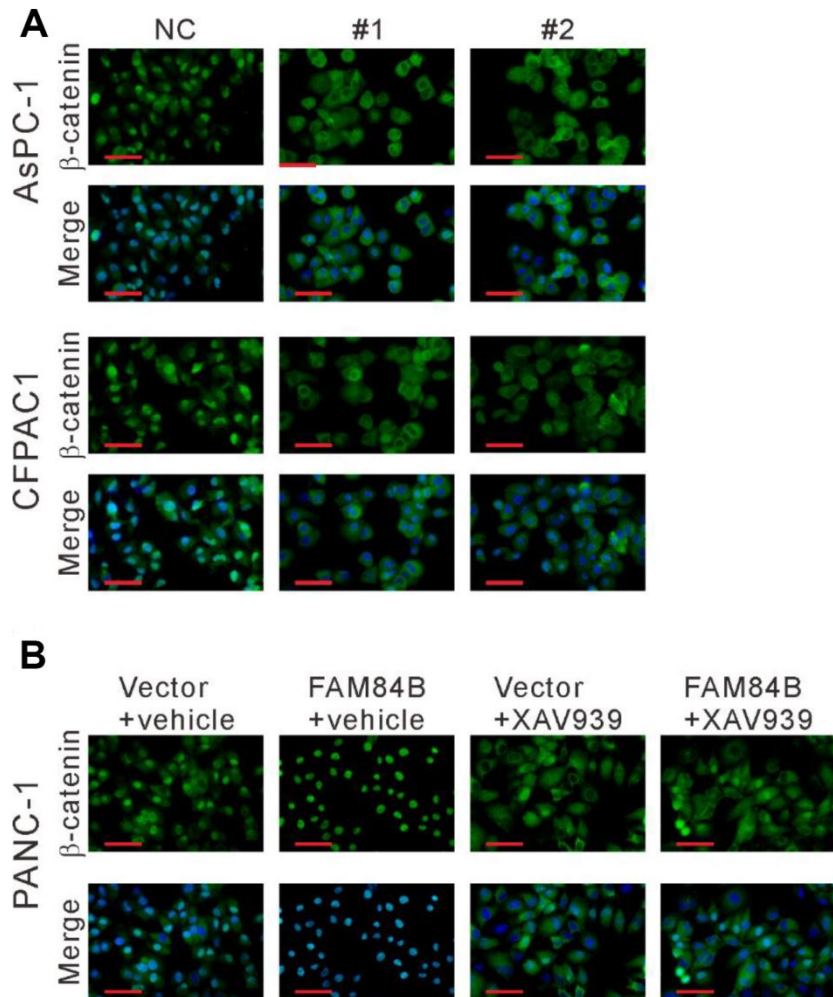

**Supplementary Figure 2. Immunofluorescence analysis of  $\beta$ -catenin (green) localization. (A)** AsPC-1 and CFPAC1 cells with FAM84B knockdown. **(B)** PANC-1 cells were transduced with lentivirus expressing Vector/FAM84B, and then treated with vehicle (DMSO, vehicle) or 10  $\mu$ M XAV939. After fixation and permeabilization, the cells were incubated with rabbit anti- $\beta$ -catenin (Abcam) and then with Alexa Fluor 488 goat anti-rabbit secondary antibody (Beyotime). DAPI (blue) was used to stain nuclei (magnification scale bar, 50  $\mu$ m).
